# Supplementary material
Source: Springer Nature journal article supplement (https://www.springermedizin.de/resource/supplementary/12885_2014_4860_MOESM8_ESM.pdf/9467514)

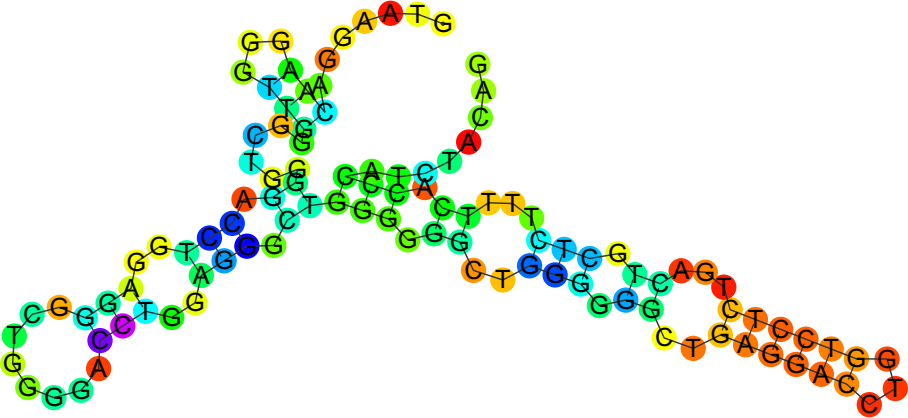

0 3.2

Supplement: MOESM8 [file 9467514]
